# Supplementary material for: Light-confining semiconductor nanoporous anodic alumina optical microcavities for photocatalysis
Source: Royal Society of Chemistry journal article supplement (doi:10.1039/c9ta08585h), 2019-01-01
Supplement: c9ta08585h1.pdf [file c9ta08585h1.pdf]

# Electronic

# Supplementary Information

## Light-Confining Semiconductor Nanoporous Anodic Alumina Optical Microcavities for Photocatalysis

Lina Liu<sup>1,2,6</sup>, Siew Yee Lim<sup>2,3,4</sup>, Cheryl Suwen Law<sup>2,3,4</sup>, Bo Jin<sup>2</sup>, Andrew D. Abell<sup>\*3,4,5</sup>, Gang Ni<sup>1,6</sup>  
and Abel Santos<sup>\*2,3,4</sup>

<sup>1</sup>State Key Laboratory of High-efficiency Utilization of Coal and Green Chemical Engineering, Ningxia University, Yinchuan 750021, P.R. China.

<sup>2</sup>School of Chemical Engineering and Advanced Materials, The University of Adelaide, Adelaide, South Australia 5005, Australia.

<sup>3</sup>Institute for Photonics and Advanced Sensing, The University of Adelaide, Adelaide, South Australia 5005, Australia.

<sup>4</sup>ARC Centre of Excellence for Nanoscale BioPhotonics, The University of Adelaide, Adelaide, South Australia 5005, Australia.

<sup>5</sup>Department of Chemistry, The University of Adelaide, Adelaide, South Australia 5005 Adelaide, Australia.

<sup>6</sup>College of Chemistry and Chemical Engineering, Ningxia University, Yinchuan 750021, P. R. China.

\*E-Mails: [andrew.abell@adelaide.edu.au](mailto:andrew.abell@adelaide.edu.au) ; [abel.santos@adelaide.edu.au](mailto:abel.santos@adelaide.edu.au)

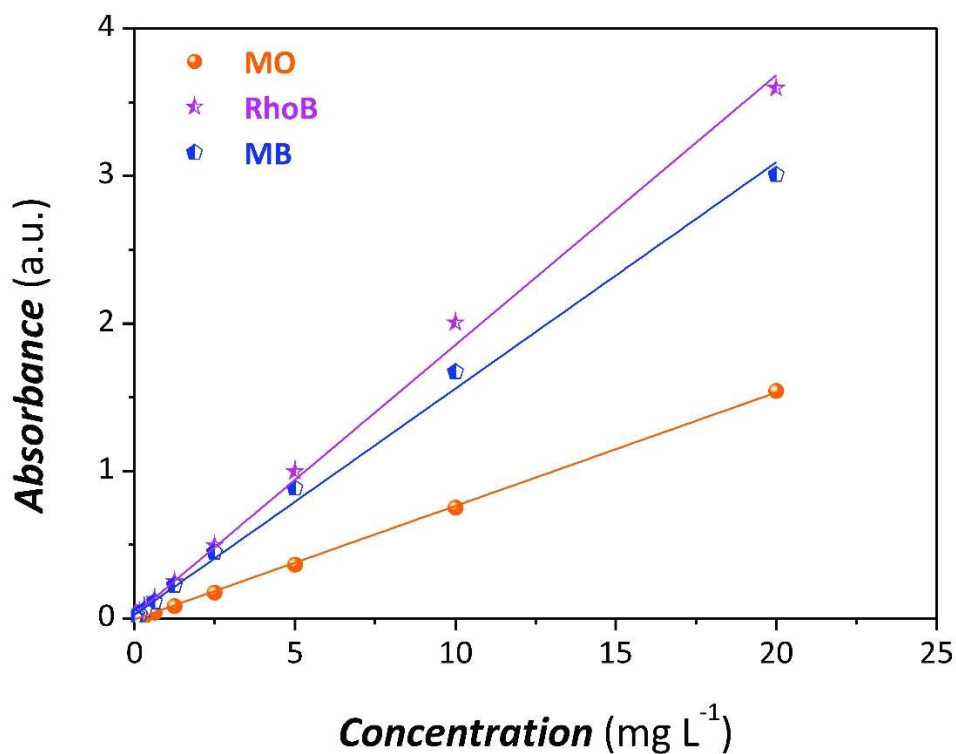

**Figure S1.** Linear correlation between absorbance and concentration of methylene blue (MB), rhodamine B (RhoB), and methyl orange (MO) (NB: concentration range from 0.00244 to 10 mg L<sup>-1</sup>). The linear correlation for MB, RhoB and MO were:  $Abs_{MB}$  (a.u.) = 0.1697 [MB] (mg L<sup>-1</sup>),  $Abs_{RhoB}$  (a.u.) = 0.19998 [RhoB] (mg L<sup>-1</sup>) and  $Abs_{MO}$  (a.u.) = 0.07436 [MO] (mg L<sup>-1</sup>), respectively. The  $R^2$  values for MB, RhoB and MO were 0.99923, 0.99979, and 0.99940, respectively.

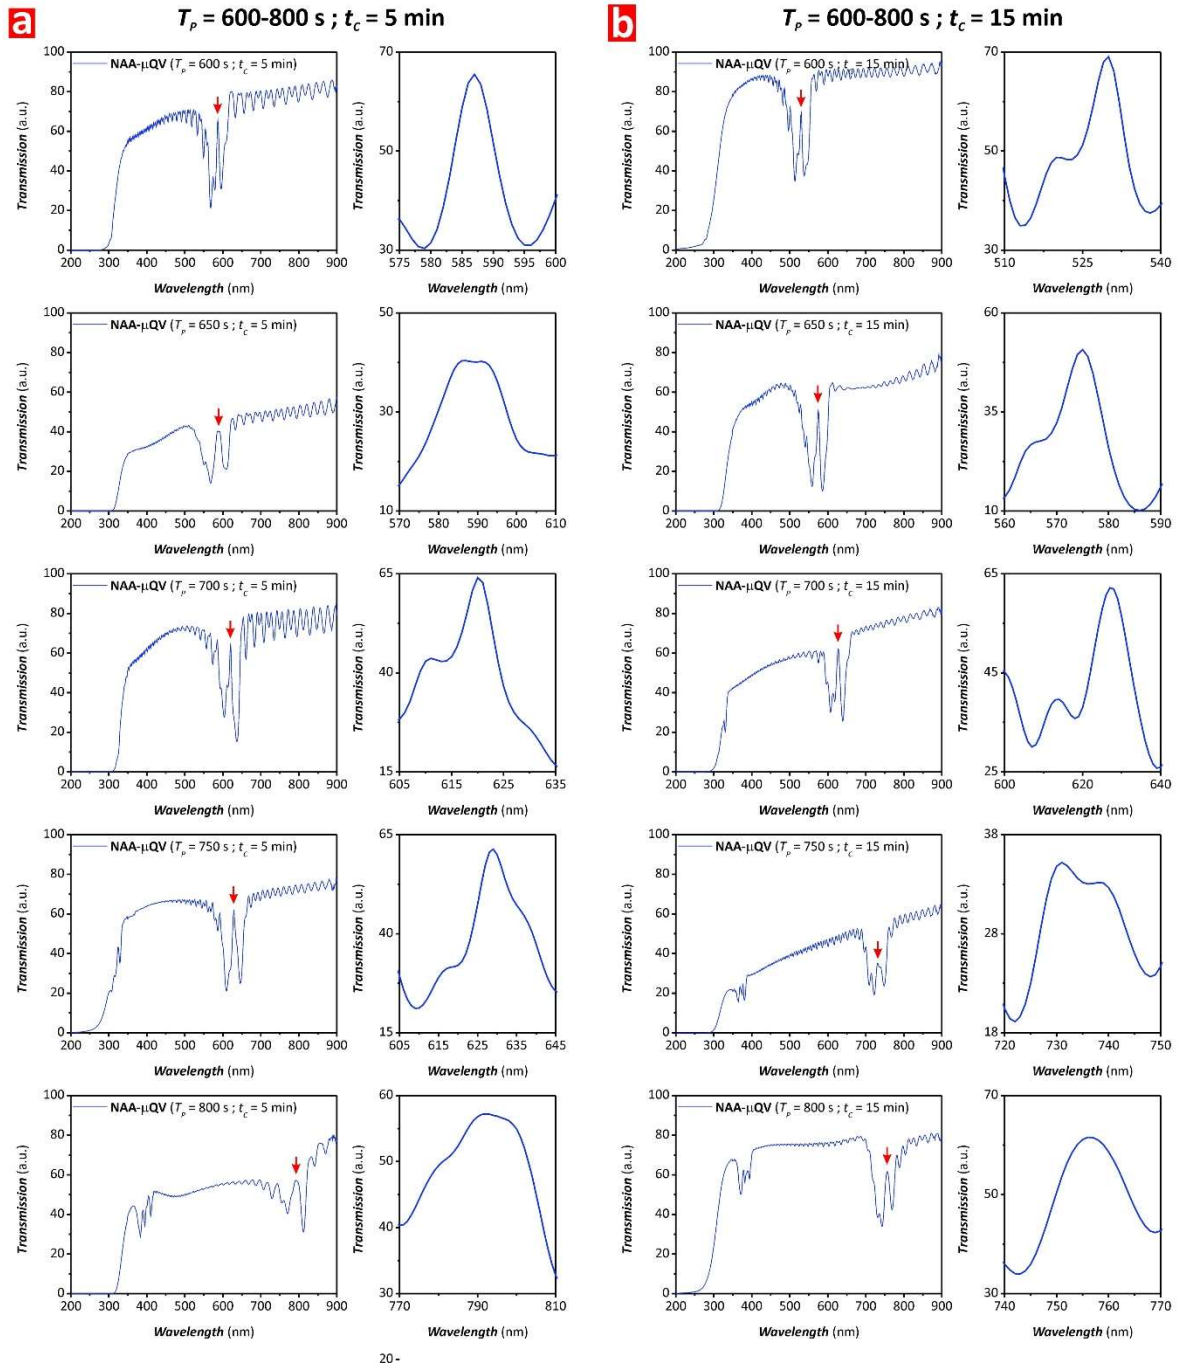

**Figure S2.** Transmission spectra of NAA- $\mu$ QVs produced with  $T_p = 600\text{--}800 \text{ s}$  and a)  $t_c = 5 \text{ min}$  (a) and  $t_c = 15 \text{ min}$  (b) (NB: full range spectra with red arrows indicating the position of the resonance band (left) and magnified view of resonance band (right)).

**Table S1.** Optical features (i.e. resonance intensity –  $I_R$ , resonance central wavelength –  $\lambda_R$ , full width at half maximum –  $FWHM_R$ , and quality factor –  $Q_R$ ) of NAA- $\mu$ QVs produced with  $T_P = 600$ – $800$  s and  $t_C = 5$  and  $15$  min, in air and water.

| $T_P$ (s) | $t_C$ (min) | Medium | $I_R$ (a.u.) | $\lambda_R$ (nm) | $FWHM_R$ (nm) | $Q_R$ |
|-----------|-------------|--------|--------------|------------------|---------------|-------|
| 600       | 5           | air    | 40           | 587              | 10            | 58    |
|           | 15          | air    | 27           | 529              | 9             | 59    |
|           | 5           | water  | 16           | 618              | 10            | 64    |
|           | 15          | water  | 13           | 537              | 7             | 79    |
| 650       | 5           | air    | 27           | 589              | 19            | 31    |
|           | 15          | air    | 34           | 569              | 19            | 30    |
|           | 5           | water  | 6            | 608              | 16            | 37    |
|           | 15          | water  | 9            | 600              | 49            | 12    |
| 700       | 5           | air    | 40           | 618              | 18            | 34    |
|           | 15          | air    | 36           | 627              | 11            | 57    |
|           | 5           | water  | 12           | 687              | 26            | 26    |
|           | 15          | water  | 25           | 668              | 10            | 64    |
| 750       | 5           | air    | 35           | 630              | 16            | 38    |
|           | 15          | air    | 16           | 735              | 17            | 44    |
|           | 5           | water  | 31           | 662              | 30            | 21    |
|           | 15          | water  | 22           | 785              | 11            | 69    |
| 800       | 5           | air    | 39           | 795              | 23            | 35    |
|           | 15          | air    | 26           | 14               | 757           | 54    |
|           | 5           | water  | 7            | 832              | 27            | 30    |
|           | 15          | water  | 27           | 17               | 792           | 48    |

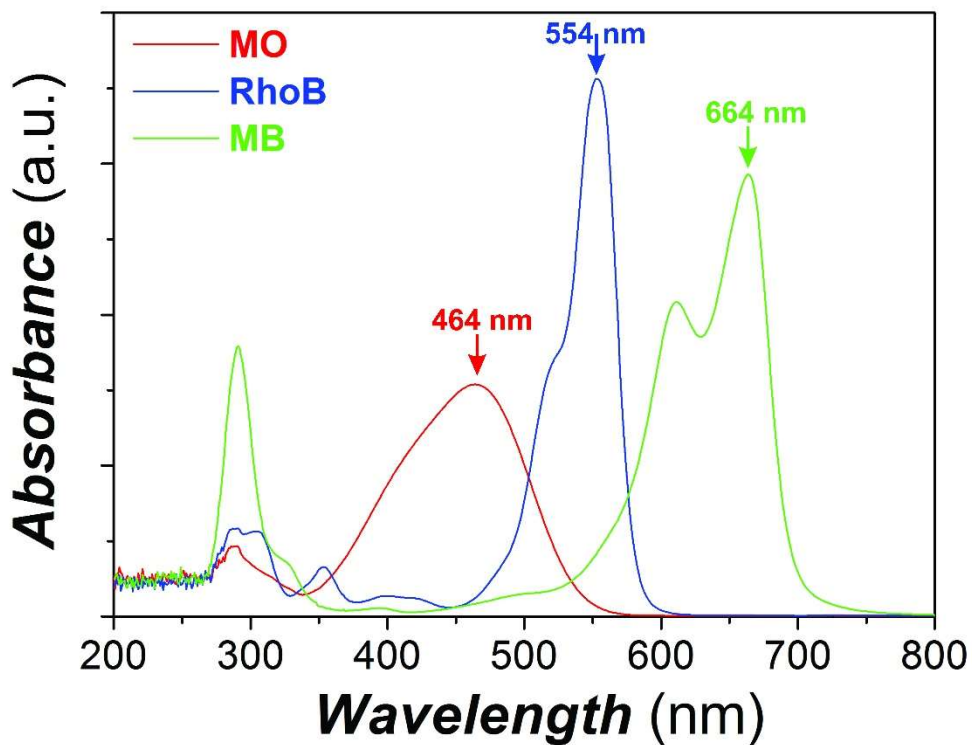

**Figure S3.** Optical absorbance spectra of methylene blue (MB), rhodamine B (RhoB), and methyl orange (MO). The absorption band maxima for MB, RhoB and MO were and  $\lambda_{\text{abs-MB}} = 664 \text{ nm}$ ,  $\lambda_{\text{abs-RhoB}} = 554 \text{ nm}$ ,  $\lambda_{\text{abs-MO}} = 464 \text{ nm}$ , respectively (NB: the absolute absorption intensities of MB, RhoB and MO at the central position were  $\sim 2.8$ ,  $3.6$  and  $1.5$  a.u., respectively).

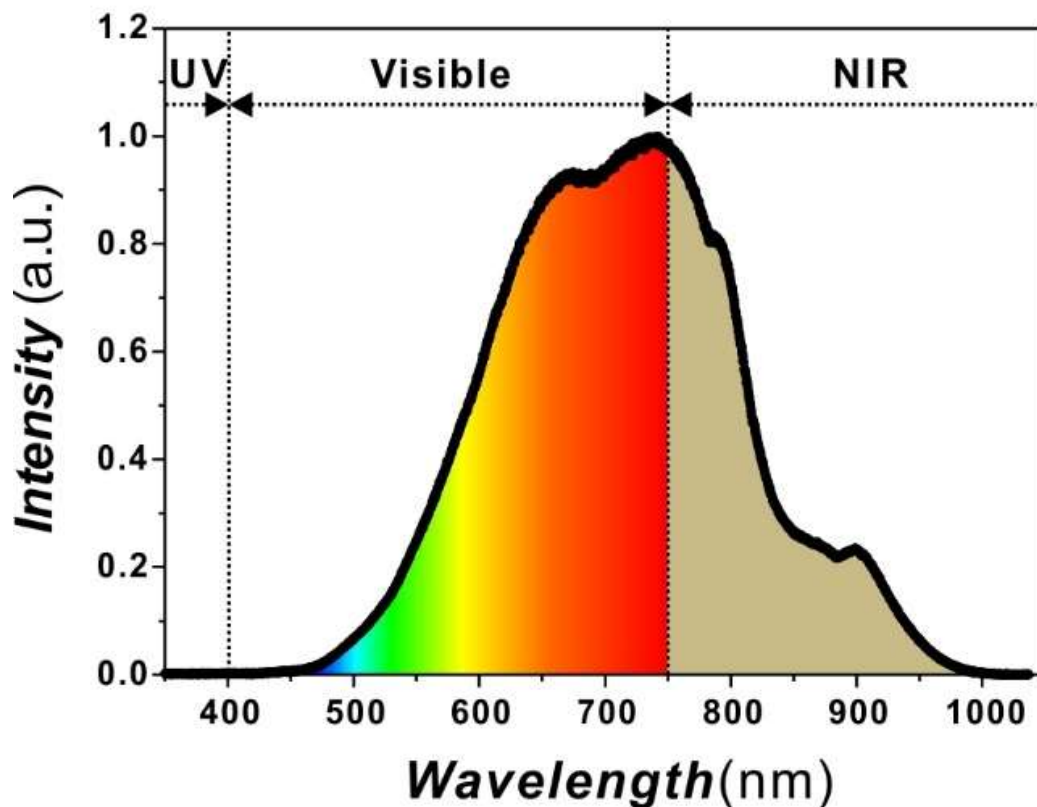

**Figure S4.** Simulated visible–NIR light irradiation source used for photocatalysis in our study (i.e. 0.12% UV (350–400 nm), 64.60% visible (400–750 nm), and 35.28% NIR (800–1025 nm)). The irradiation spectrum was measured using an optical fiber spectrometer (USB 4000, Ocean Optics, USA).

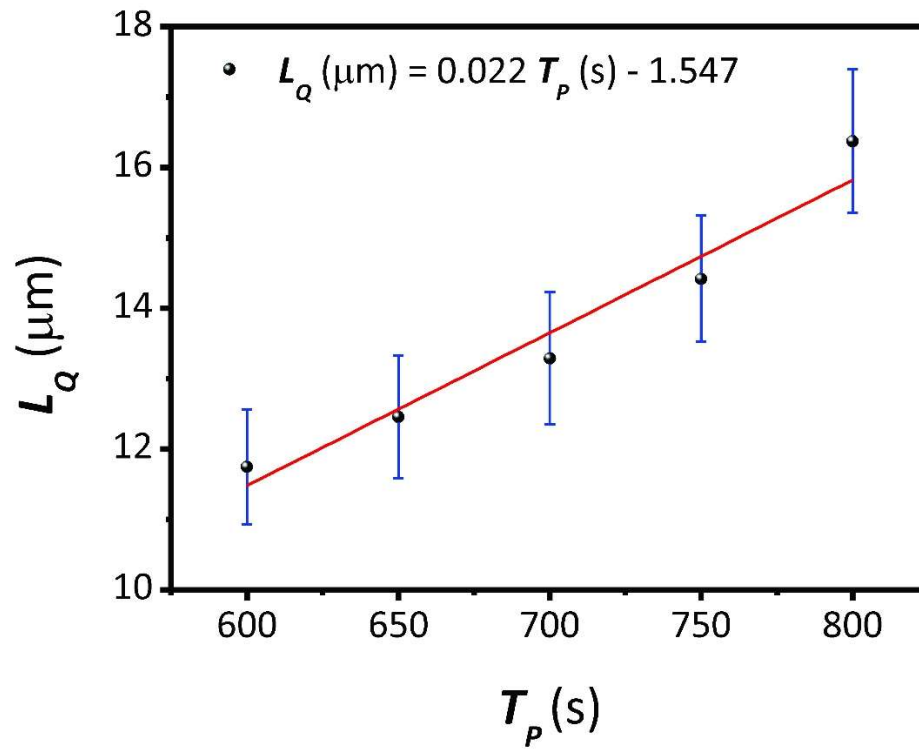

**Figure S5.** Linear fitting describing the dependence between the total thickness of  $\text{TiO}_2$ -NAA- $\mu\text{QVs}$  ( $L_Q$ ) and the anodization period ( $T_p$ ).

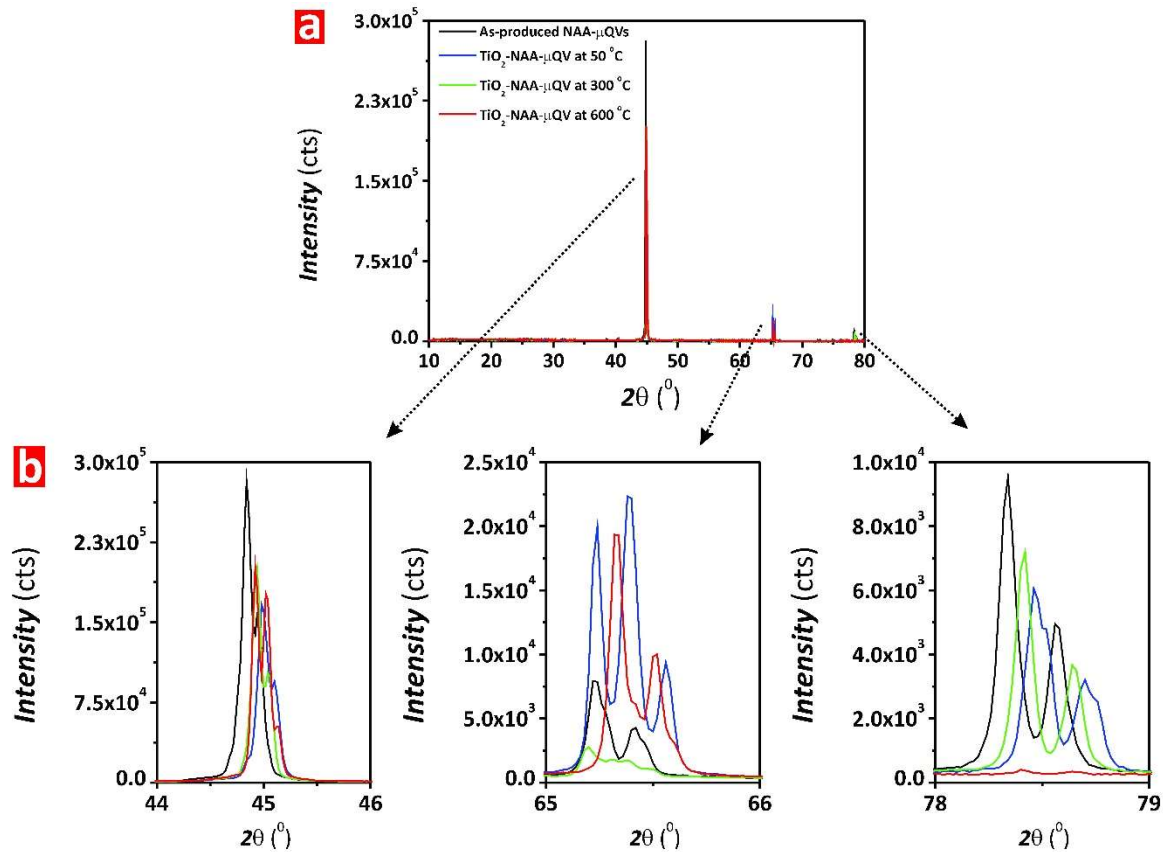

**Figure S6.** X-ray diffraction (XRD) spectra of a representative NAA- $\mu$ QVs before and after sol-gel deposition of TiO<sub>2</sub> at different annealing temperatures (50, 300 and 600 °C) (measurements performed in an XRD Rigaku MiniFlex 600). a) General XRD spectrum and b) magnified view of characteristic XRD peaks. NB: Before sol-gel deposition, there are three characteristic peaks in the XRD spectrum located at 45, 65.2 and 78.4°, which correspond to amorphous alumina (Al<sub>2</sub>O<sub>3</sub>) phase. After deposition of the TiO<sub>2</sub> functional layer, there no additional peak is observed in the XRD spectrum, indicating that the TiO<sub>2</sub> layer is crystallographically amorphous. However, the position of these peaks undergoes a slight shift in their position and their intensity changes, confirming the successful deposition of photo-active layers of TiO<sub>2</sub> onto the inner surface of NAA- $\mu$ QVs. The crystallographic phase of TiO<sub>2</sub> undergoes transformation from amorphous (50 °C) to rutile (600 °C) phases.
